# Supplementary material for: Psoriasis-Associated Inflammatory Conditions Induce IL-23 mRNA Expression in Normal Human Epidermal Keratinocytes
Source: MDPI journal article supplement (doi:10.3390/ijms23010540), 2022-01-04
Supplement: s1 [file s1]

**Supplementary Table S1.** – List of genes included in the qPCR-array.

| Gene Symbol | Alias                                                                                                                                                                                                                                                                                                                                                                                                                                      | Refseq #     | Official Full Name                           |
|-------------|--------------------------------------------------------------------------------------------------------------------------------------------------------------------------------------------------------------------------------------------------------------------------------------------------------------------------------------------------------------------------------------------------------------------------------------------|--------------|----------------------------------------------|
| AIM2        | PYHIN4, OTTHUMP00000035296, interferon-inducible protein AIM2, RP11-520H16.3                                                                                                                                                                                                                                                                                                                                                               | NM_004833    | absent in melanoma 2                         |
| CARD14      | caspase recruitment domain protein 14, BIMP2, carma 2, CARD-containing MAGUK 2 protein, CARMA2, card-maguk protein 2, CARD-containing MAGUK protein 2, bcl10-interacting maguk protein 2, caspase recruitment domain-containing protein 14                                                                                                                                                                                                 | NM_024110    | caspase recruitment domain family, member 14 |
| CARD18      | ICEBERG, caspase recruitment domain-containing protein 18, ICEBERG caspase-1 inhibitor, caspase-1 inhibitor Iceberg, OTTHUMP00000232068, UNQ5804/PRO19611                                                                                                                                                                                                                                                                                  | NM_021571    | caspase recruitment domain family, member 18 |
| DCD         | AIDD protein, MGC71930, diffusible survival/evasion peptide, HCAP, DCD-1, proteolysis inducing factor, DSEP, preproteolysin, AIDD, survival promoting peptide, PIF                                                                                                                                                                                                                                                                         | NM_053283    | dermcidin                                    |
| GSDMC       | melanoma-derived leucine zipper, extra-nuclear factor, OTTHUMP00000227707, melanoma-derived leucine zipper-containing extranuclear factor, MLZE, gasdermin-C                                                                                                                                                                                                                                                                               | NM_031415    | gasdermin C                                  |
| GSDMD       | DF5L, FKSG10, OTTHUMP00000228550, GSDMDC1, gasdermin-D, 1810036L03Rik, FLJ12150, OTTHUMP00000228551, gasdermin domain-containing protein 1, gasdermin domain containing 1, OTTHUMP00000228549                                                                                                                                                                                                                                              | NM_001166237 | gasdermin D                                  |
| DEFB1       | BD1, OTTHUMP00000159500, DEFB-1, HBD1, beta-defensin 1, beta-defensin-1, DEFB101, BD-1, MGC51822                                                                                                                                                                                                                                                                                                                                           | NM_005218    | defensin, beta 1                             |
| DEFB4A      | SAP1, DEFB102, OTTHUMP00000159651, skin-antimicrobial peptide 1, beta-defensin 2, BD-2, DEFB2, defensin, beta 4, DEFB4, beta-defensin 4A, HBD-2, defensin, beta 2, DEFB-2                                                                                                                                                                                                                                                                  | NM_004942    | defensin, beta 4A                            |
| HMGB1       | HMG1, OTTHUMP00000018198, HMG3, DKFZp686A04236, OTTHUMP00000018196, OTTHUMP00000018199, high-mobility group (nonhistone chromosomal) protein 1, OTTHUMP00000190859, high mobility group protein B1, SBP-1, OTTHUMP00000200117, HMG-1, high mobility group box 1, OTTHUMP00000018197, high-mobility group box 1, Amphoterin, high mobility group protein 1, OTTHUMP00000190860, Sulfoglucuronyl carbohydrate binding protein, RP11-550P23.1 | NM_002128    | high mobility group box 1                    |
| IFI16       | PYHIN2, interferon-gamma induced protein IFI 16, OTTHUMP00000035197, IFNGIP1, interferon-inducible myeloid differentiation transcriptional activator, gamma-interferon-inducible protein 16, OTTHUMP00000035192, OTTHUMP00000035193, ifi-16                                                                                                                                                                                                | NM_001206567 | interferon, gamma-inducible protein 16       |
| IL19        | MDA1, melanoma differentiation-associated protein-like protein, melanoma differentiation associated protein-like protein, IL-10C, interleukin-19, OTTHUMP00000216804, OTTHUMP00000034568, ZMDA1, NG.1, RP11-262N9.2                                                                                                                                                                                                                        | NM_013371    | interleukin 19                               |

|        |                                                                                                                                                                                                                                                                                                                                                                                                                                                                                                                                                                                                                                                                                                   |           |                                                           |
|--------|---------------------------------------------------------------------------------------------------------------------------------------------------------------------------------------------------------------------------------------------------------------------------------------------------------------------------------------------------------------------------------------------------------------------------------------------------------------------------------------------------------------------------------------------------------------------------------------------------------------------------------------------------------------------------------------------------|-----------|-----------------------------------------------------------|
| IL36G  | IL-1-epsilon, IL-1RP2, interleukin-1 family member 9, OTTHUMP00000203690, interleukin-1 homolog 1, IL-1 epsilon, IL1F9, interleukin 1 family, member 9, interleukin 1-related protein 2, IL-1-related protein 2, interleukin-1 epsilon, interleukin-36 gamma, IL1H1, IL-1F9, IL1RP2, IL-1(EPSILON), IL-1 related protein 2, IL1E, IL-1H1, OTTHUMP00000203689, UNQ2456/PRO5737                                                                                                                                                                                                                                                                                                                     | NM_019618 | interleukin 36, gamma                                     |
| IL36RN | FIL1, FIL1 delta, interleukin-1 family member 5, IL1RP3, IL1HY1, IL-1-related protein 3, IL1F5, interleukin 1 family, member 5 (delta), interleukin-36 receptor antagonist protein, interleukin-1-like protein 1, family of interleukin 1-delta, interleukin 1, delta, interleukin-1 HY1, IL-1F5 (IL-1HY1, FIL1-delta, IL-1RP3, IL-1L1, IL-1-delta), IL1F5 (Canonical product IL-1F5a), interleukin-1 delta, FIL1D, IL-1HY1, interleukin 1 family, member 5, interleukin-1 receptor antagonist homolog 1, IL-1ra homolog 1, OTTHUMP00000203698, OTTHUMP00000203697, FIL1(Delta), OTTHUMP00000162015, IL-1L1, IL-1 related protein 3, IL-1ra homolog, IL1L1, MGC29840, IL-1 delta, UNQ1896/PRO4342 | NM_012275 | interleukin 36 receptor antagonist                        |
| IFIH1  | Hlcd, RNA helicase-DEAD box protein 116, RIG-I-like receptor 2, interferon-induced with helicase C domain protein 1, helicard, CADM-140 autoantigen, IDDM19, MDA5, murabutide down-regulated protein, MGC133047, melanoma differentiation associated protein-5, melanoma differentiation-associated protein 5, interferon-induced helicase C domain-containing protein 1, helicase with 2 CARD domains, DEAD/H (Asp-Glu-Ala-Asp/His) box polypeptide, clinically amyopathic dermatomyositis autoantigen 140 kDa, OTTHUMP00000162935, MDA-5                                                                                                                                                        | NM_022168 | interferon induced with helicase C domain 1               |
| PYDC1  | pyrin-only protein 1, POP1, PAAD-only protein 1, pyrin-domain containing protein 1, pyrin domain-containing protein 1, PYC1, OTTHUMP00000163243, pyrin domain containing 1, PAAD-only protein                                                                                                                                                                                                                                                                                                                                                                                                                                                                                                     | NM_152901 | PYD (pyrin domain) containing 1                           |
| DDX58  | RIG-I, OTTHUMP00000115910, DKFZp686N19181, RIG-1, retinoic acid-inducible gene I, OTTHUMP00000045225, RIG-I-like receptor 1, DEAD/H (Asp-Glu-Ala-Asp/His) box polypeptide, RNA helicase, FLJ13599, retinoic acid-inducible gene 1 protein, retinoic acid inducible gene I, DEAD box protein 58, retinoic acid-inducible gene I protein, probable ATP-dependent RNA helicase DDX58, DEAD/H (Asp-Glu-Ala-Asp/His) box polypeptide RIG-I, RNA helicase RIG-I, OTTHUMP00000021185, RP11-334P12.2                                                                                                                                                                                                      | NM_014314 | DEAD (Asp-Glu-Ala-Asp) box polypeptide 58                 |
| POLR3A | RPC1, DNA-directed RNA polymerase III largest subunit, RNA polymerase III 155 kDa subunit, OTTHUMP00000060199, hRPC155, DNA-directed RNA polymerase III subunit RPC1, RPC155, RNA polymerase III subunit C1, RNA polymerase III subunit C160, DNA-directed RNA polymerase III subunit A, RNA polymerase III subunit RPC155-D, OTTHUMP00000019920                                                                                                                                                                                                                                                                                                                                                  | NM_007055 | polymerase (RNA) III (DNA directed) polypeptide A, 155kDa |
| RNASE7 | ribonuclease 7, skin-derived antimicrobial protein 2, MGC133220, OTTHUMP00000195134, RNase 7, SAP-2, UNQ2516/PRO6006                                                                                                                                                                                                                                                                                                                                                                                                                                                                                                                                                                              | NM_032572 | ribonuclease, RNase A family, 7                           |

|         |                                                                                                                                                                                                                                                                                                                                                                                                                                                                                                                                                                                                                                        |              |                                             |
|---------|----------------------------------------------------------------------------------------------------------------------------------------------------------------------------------------------------------------------------------------------------------------------------------------------------------------------------------------------------------------------------------------------------------------------------------------------------------------------------------------------------------------------------------------------------------------------------------------------------------------------------------------|--------------|---------------------------------------------|
| S100A7  | PSOR1, OTTHUMP00000015328, S100 calcium-binding protein A7 (psoriasin 1), protein S100-A7, psoriasin 1, S100 calcium-binding protein A7, OTTHUMP00000015327, S100 calcium binding protein A7 (psoriasin 1), S100A7c                                                                                                                                                                                                                                                                                                                                                                                                                    | NM_002963    | S100 calcium binding protein A7             |
| S100A8  | P8, OTTHUMP00000015330, 60B8AG, cystic fibrosis antigen, calprotectin L1L subunit, S100 calcium-binding protein A8 (calgranulin A), MRP-8, OTTHUMP00000015329, CP-10, MA387, urinary stone protein band A, calgranulin-A, MRP8, MIF, L1Ag, S100 calcium binding protein A8 (calgranulin A), CAGA, migration inhibitory factor-related protein 8, leukocyte L1 complex light chain, calgranulin A, S100 calcium-binding protein A8, protein S100-A8, CGLA, CFAG, NIF                                                                                                                                                                    | NM_002964    | S100 calcium binding protein A8             |
| S100A9  | S100 calcium-binding protein A9, CAGB, CGLB, migration inhibitory factor-related protein 14, S100 calcium binding protein A9 (calgranulin B), calprotectin L1H subunit, L1AG, protein S100-A9, NIF, S100 calcium-binding protein A9 (calgranulin B), MAC387, calgranulin B, leukocyte L1 complex heavy chain, MRP14, OTTHUMP00000015331, MIF, L1AG, MRP-14, calgranulin-B, 60B8AG, P14, CFAG                                                                                                                                                                                                                                           | NM_002965    | S100 calcium binding protein A9             |
| PYDC2   | LOC152138, OTTHUMP00000225036, pyrin-only protein 2, pyrin domain-containing protein 2, POP2                                                                                                                                                                                                                                                                                                                                                                                                                                                                                                                                           | NM_001083308 | pyrin domain containing 2                   |
| SOCS1   | JAB, SSI-1, Tec-interacting protein 3, OTTHUMP00000160221, CIS1, SSI1, STAT-induced STAT inhibitor 1, JAK-binding protein, STAT induced SH3 protein 1, cytokine-inducible SH2 protein 1, TIP-3, SOCS-1, JAK binding protein, CISH1, TIP3                                                                                                                                                                                                                                                                                                                                                                                               | NM_003745    | suppressor of cytokine signaling 1          |
| TMEM173 | LOC340061, OTTHUMP00000159544, endoplasmic reticulum IFN stimulator, stimulator of interferon genes, mitochondrial mediator of IRF3 activation, N-terminal methionine-proline-tyrosine-serine plasma membrane tetraspanner, hSTING, mediator of IRF3 activation, OTTHUMP00000223443, OTTHUMP00000223442, endoplasmic reticulum interferon stimulator, hypothetical protein LOC340061, stimulator of interferon genes protein, hMITA                                                                                                                                                                                                    | NM_198282    | transmembrane protein 173                   |
| TLR3    | CD283, OTTHUMP00000218073                                                                                                                                                                                                                                                                                                                                                                                                                                                                                                                                                                                                              | NM_003265    | toll-like receptor 3                        |
| TLR7    | OTTHUMP00000022919, toll-like receptor 7-like, UNQ248/PRO285                                                                                                                                                                                                                                                                                                                                                                                                                                                                                                                                                                           | NM_016562    | toll-like receptor 7                        |
| OAS2    | P69, (2'-5')oligo(A) synthetase 2, 2'-5'-oligoadenylate synthetase 2 (69-71 kD), 2-5A synthetase 2, (2'-5')oligo(A) synthetase 2, MGC78578, 2'-5'-oligoadenylate synthase 2, 2'-5'-oligoadenylate synthetase 2, p69 OAS / p71 OAS, 2'-5'-oligoadenylate synthetase 2, (2'-5')oligo(A) synthetase 2, (2'-5')oligo(A) synthase 2, 2'-5'-oligoadenylate synthetase 2, 2'-5'-oligoadenylate synthetase 2, 2'-5'-oligoadenylate synthetase 2 (69-71 kD), 2-5A synthase 2, 2'-5'-oligoadenylate synthetase 2 (69-71 kD), p69OAS / p71OAS, 2'-5'-oligoadenylate synthetase 2, (2'-5')oligo(A) synthetase 2, 2'-5'-oligoadenylate synthetase 2 | NM_001032731 | 2'-5'-oligoadenylate synthetase 2, 69/71kDa |

|       |                                                                                                                                                                                                                                                                                                                                                                                                                                                                                                                                                                                                                                        |                                                                   |                                                 |
|-------|----------------------------------------------------------------------------------------------------------------------------------------------------------------------------------------------------------------------------------------------------------------------------------------------------------------------------------------------------------------------------------------------------------------------------------------------------------------------------------------------------------------------------------------------------------------------------------------------------------------------------------------|-------------------------------------------------------------------|-------------------------------------------------|
| BPI   | bK2308N23.1 (bactericidal/permeability-increasing protein), CAP 57, OTTHUMP00000030963, BPI fold containing family D, member 1, OTTHUMP00000030962, bactericidal permeability-increasing protein, recombinant BPI holoprotein, rBPI, RP13-218F6_A.1                                                                                                                                                                                                                                                                                                                                                                                    | NM_001725                                                         | bactericidal/permeability-increasing protein    |
| CAMP  | LL37, CAP-18, hCAP-18, OTTHUMP00000164805, FALL39, FALL-39, CAP18, HSD26, 18 kDa cationic antimicrobial protein                                                                                                                                                                                                                                                                                                                                                                                                                                                                                                                        | NM_004345                                                         | cathelicidin antimicrobial peptide              |
| CASP1 | caspase 1, interleukin-1 beta convertase, interleukin-1 beta-converting enzyme, IL-1 beta-converting enzyme, OTTHUMP00000232031, OTTHUMP00000045728, OTTHUMP00000232030, caspase 1, apoptosis-related cysteine peptidase (interleukin 1, beta, convertase), caspase 1, apoptosis-related cysteine protease (interleukin 1, beta, convertase), IL1BC, interleukin 1-beta convertase, interleukin 1-B converting enzyme, P45, IL-1BC, CASP1 nirs variant 1, IL1B-convertase, CASP-1, OTTHUMP00000232036, OTTHUMP00000232033, OTTHUMP00000232032, caspase-1, interleukin 1, beta, convertase, OTTHUMP00000232034, OTTHUMP00000232029, ICE | NM_001223,<br>NM_033292,<br>NM_033293,<br>NM_033294,<br>NM_033295 | caspase 1, apoptosis-related cysteine peptidase |
| CASP8 | MACH, procaspase-8L, MORT1-associated ced-3 homolog, caspase, apoptotic cysteine protease, OTTHUMP00000163717, caspase 8, apoptotic protease Mch-5, FLICE, caspase 8, apoptosis-related cysteine protease, FADD-homologous ICE/CED-3-like protease, OTTHUMP00000206552, OTTHUMP00000163720, Mch5 isoform alpha, MACH-beta-1/2/3/4 protein, OTTHUMP00000163718, MACH-alpha-1/2/3 protein, cysteine protease, OTTHUMP00000165062, CAP4, OTTHUMP00000163719, OTTHUMP00000165064, caspase-8, MGC78473, MCH5, FADD-like ICE, OTTHUMP00000165063, procaspase-8, OTTHUMP00000206581, ICE-like apoptotic protease 5, OTTHUMP00000206557        | NM_001080124                                                      | caspase 8, apoptosis-related cysteine peptidase |
| CCL17 | small inducible cytokine A17, small-inducible cytokine A17, ABCD-2, OTTHUMP00000164673, small inducible cytokine subfamily A (Cys-Cys), member 17, MGC138273, thymus and activation-regulated chemokine, CC chemokine TARC, MGC138271, A-152E5.3, C-C motif chemokine 17, SCYA17, T cell-directed CC chemokine, TARC                                                                                                                                                                                                                                                                                                                   | NM_002987                                                         | chemokine (C-C motif) ligand 17                 |
| CCL3  | LD78 alpha beta, Small inducible cytokine A3, OTTHUMP00000163953, SIS-beta, MIP1A, small-inducible cytokine A3, PAT 464.1, SCYA3, C-C motif chemokine 3, LD78ALPHA, tonsillar lymphocyte LD78 alpha protein, MIP-1-alpha, G0S19-1, macrophage inflammatory protein 1-alpha, G0/G1 switch regulatory protein 19-1, small inducible cytokine A3 (homologous to mouse Mip-1a), MIP-1A                                                                                                                                                                                                                                                     | NM_002983                                                         | chemokine (C-C motif) ligand 3                  |

|       |                                                                                                                                                                                                                                                                                                                                                                                                                                                                                                                                                                                                              |              |                                                                                |
|-------|--------------------------------------------------------------------------------------------------------------------------------------------------------------------------------------------------------------------------------------------------------------------------------------------------------------------------------------------------------------------------------------------------------------------------------------------------------------------------------------------------------------------------------------------------------------------------------------------------------------|--------------|--------------------------------------------------------------------------------|
| CCL5  | small inducible cytokine A5, D17S136E, TCP228, regulated upon activation, normally T-expressed, and presumably secreted, eosinophil chemotactic cytokine, beta-chemokine RANTES, SIS-delta, RANTES, t cell-specific protein P228, small inducible cytokine subfamily A (Cys-Cys), member 5, T-cell-specific protein RANTES, chemokine ligand 5, T-cell specific RANTES protein, SCYA5, small inducible cytokine A5 (RANTES), T-cell specific protein p288, OTTHUMP00000197106, SISd, C-C motif chemokine 5, beta-chemokine RANTES precursor, small-inducible cytokine A5, OTTHUMP00000163880, MGC17164, eoCP | NM_002985    | chemokine (C-C motif) ligand 5                                                 |
| CCL2  | small inducible cytokine A2, monocyte chemoattractant protein 1, small-inducible cytokine A2, small inducible cytokine A2 (monocyte chemotactic protein 1, homologous to mouse Sig-je), OTTHUMP00000163799, monocyte chemotactic protein 1, HSMCR30, small inducible cytokine subfamily A (Cys-Cys), member 2, MCP-1, SCYA2, MCAF, SMC-CF, GDCF-2 HC11, HC11, monocyte chemotactic protein 1, homologous to mouse Sig-je, MGC9434, monocyte secretory protein JE, C-C motif chemokine 2, GDCF-2, MCP1, monocyte chemotactic and activating factor, monocyte chemoattractant protein-1                        | NM_002982    | chemokine (C-C motif) ligand 2                                                 |
| CCL20 | CKb4, small-inducible cytokine A20, SCYA20, small inducible cytokine subfamily A (Cys-Cys), member 20, C-C motif chemokine 20, ST38, exodus-1, liver and activation-regulated chemokine, macrophage inflammatory protein 3 alpha, MIP-3-alpha, OTTHUMP00000164245, OTTHUMP00000204113, beta chemokine exodus-1, LARC, MIP-3a, beta-chemokine exodus-1, CC chemokine LARC, MIP3A                                                                                                                                                                                                                              | NM_001130046 | chemokine (C-C motif) ligand 20                                                |
| CXCL1 | GRO1, growth-regulated alpha protein, GRO1 oncogene (melanoma growth stimulating activity, alpha), GROa, OTTHUMP00000219186, fibroblast secretory protein, MGSA alpha, chemokine (C-X-C motif) ligand 1, MGSA, C-X-C motif chemokine 1, SCYB1, MGSA-a, GRO-alpha(1-73), GRO1 oncogene (melanoma growth-stimulating activity), melanoma growth stimulatory activity alpha, neutrophil-activating protein 3, NAP-3, GRO1, GROa, SCYB1                                                                                                                                                                          | NM_001511    | chemokine (C-X-C motif) ligand 1 (melanoma growth stimulating activity, alpha) |
| CXCL2 | GRO2 oncogene, MGSA-b, MGSA beta, SCYB2, MIP2-alpha, gro-beta, OTTHUMP00000219185, MIP-2a, growth-regulated protein beta, CINC-2a, C-X-C motif chemokine 2, MIP2, GRO2, MIP2A, GROb, melanoma growth stimulatory activity beta, macrophage inflammatory protein 2-alpha, GRO2, GROb, SCYB2                                                                                                                                                                                                                                                                                                                   | NM_002089    | chemokine (C-X-C motif) ligand 2                                               |
| FADD  | Fas-associated via death domain, Fas-associating protein with death domain, FAS-associated death domain protein, Fas-associating protein, MORT1, growth-inhibiting gene 3 protein, OTTHUMP00000235551, MGC8528, mediator of receptor induced toxicity, mediator of receptor-induced toxicity, GIG3, protein FADD, Fas-associating death domain-containing protein                                                                                                                                                                                                                                            | NM_003824    | Fas (TNFRSF6)-associated via death domain                                      |

|        |                                                                                                                                                                                                                                                                                                                                                                                                                                                                                                                                                                                                                                         |              |                                   |
|--------|-----------------------------------------------------------------------------------------------------------------------------------------------------------------------------------------------------------------------------------------------------------------------------------------------------------------------------------------------------------------------------------------------------------------------------------------------------------------------------------------------------------------------------------------------------------------------------------------------------------------------------------------|--------------|-----------------------------------|
| IFNA1  | IFN-alpha 1b, IFL, IFNA13, OTTHUMP00000021142, IFN, MGC138505, IFN-ALPHA, IeIF D, MGC138207, MGC138507, interferon alpha 1b, interferon alpha-D, IFN-alpha-1/13, interferon alpha-1/13, interferon-alpha1, OTTHUMP00000045110, IFNA@                                                                                                                                                                                                                                                                                                                                                                                                    | NM_024013    | interferon, alpha 1               |
| IFNB1  | IFB, fibroblast interferon, IFN-beta, IFF, IFNB, interferon beta, MGC96956, OTTHUMP00000021131, RP11-113D19.1                                                                                                                                                                                                                                                                                                                                                                                                                                                                                                                           | NM_002176    | interferon, beta 1, fibroblast    |
| IL12A  | CLMF, IL-12 subunit p35, IL35 subunit, OTTHUMP00000213703, interleukin-12 alpha chain, NF cell stimulatory factor chain 1, CLMF p35, natural killer cell stimulatory factor 1, 35 kD subunit, NKSF1, OTTHUMP00000213704, OTTHUMP00000213705, interleukin-12 alpha chain precursor, interleukin 12, p35, NK cell stimulatory factor chain 1, NFSK, IL-12A, cytotoxic lymphocyte maturation factor 1, p35, interleukin 12A, IL-12, subunit p35, interleukin-12 subunit alpha, cytotoxic lymphocyte maturation factor 35 kDa subunit, interleukin 12A (natural killer cell stimulatory factor 1, cytotoxic lymphocyte maturation factor 1, | NM_000882    | interleukin 12A                   |
| IL12B  | interleukin 12B, CLMF p40, NK cell stimulatory factor chain 2, IL-12 subunit p40, CLMF, cytotoxic lymphocyte maturation factor 2, p40, cytotoxic lymphocyte maturation factor 40 kDa subunit, IL12, subunit p40, natural killer cell stimulatory factor, 40 kD subunit, OTTHUMP00000160820, natural killer cell stimulatory factor-2, CLMF2, interleukin 12, p40, NKSF, interleukin-12 subunit beta, IL-12B, interleukin-12 beta chain, NKSF2, interleukin 12B (natural killer cell stimulatory factor 2, cytotoxic lymphocyte maturation factor 2,                                                                                     | NM_002187    | interleukin 12B                   |
| IL18   | IGIF, OTTHUMP00000234749, interferon-gamma-inducing factor, MGC12320, interferon gamma-inducing factor, IFN-gamma-inducing factor, iboctadecin, IL-1 gamma, IL-1g, IL1F4, interleukin-1 gamma, OTTHUMP00000234751, IL-18, OTTHUMP00000234750, interleukin 18, interleukin-18, interleukin 18 (interferon-gamma-inducing factor)                                                                                                                                                                                                                                                                                                         | NM_001243211 | interleukin 18                    |
| CX3CL1 | NTN, C-X3-C motif chemokine 1, CX3C membrane-anchored chemokine, SCYD1, CXC3C, ABCD-3, CXC3, neurotactin, NTT, small inducible cytokine subfamily D (Cys-X3-Cys), member-1, small-inducible cytokine D1, C3Xkine, OTTHUMP00000164674, small inducible cytokine subfamily D (Cys-X3-Cys), member 1 (fractalkine, neurotactin), small inducible cytokine subfamily D (Cys-X3-Cys), member 1, fractalkine, A-152E5.2                                                                                                                                                                                                                       | NM_002996    | chemokine (C-X3-C motif) ligand 1 |
| IL1B   | IL-1, IL-1 beta, IL1-BETA, IL1F2, interleukin-1 beta, OTTHUMP00000203693, catabolin, pro-interleukin-1-beta, OTTHUMP00000203694, OTTHUMP00000203695, OTTHUMP00000162031, preinterleukin 1 beta                                                                                                                                                                                                                                                                                                                                                                                                                                          | NM_000576    | interleukin 1, beta               |
| IL6    | HGF, BSF-2, OTTHUMP00000198489, CTL differentiation factor, B cell stimulatory factor-2, OTTHUMP00000158544, OTTHUMP00000198490, HSF, B-cell stimulatory factor 2, BSF2, B-cell differentiation factor, IFNB2, IFN-beta-2, interleukin 6, CDF, interleukin-6, interleukin BSF-2, hybridoma                                                                                                                                                                                                                                                                                                                                              | NM_000600    | interleukin 6                     |

|        |                                                                                                                                                                                                                                                                                                                                                                                                                                                                                                                                                                                                                                                                                                                                                                                                                                                                                                                                                                                                                                                                      |              |                                    |
|--------|----------------------------------------------------------------------------------------------------------------------------------------------------------------------------------------------------------------------------------------------------------------------------------------------------------------------------------------------------------------------------------------------------------------------------------------------------------------------------------------------------------------------------------------------------------------------------------------------------------------------------------------------------------------------------------------------------------------------------------------------------------------------------------------------------------------------------------------------------------------------------------------------------------------------------------------------------------------------------------------------------------------------------------------------------------------------|--------------|------------------------------------|
|        | growth factor, interferon beta-2, OTTHUMP00000198486, IL-6, interferon, beta 2                                                                                                                                                                                                                                                                                                                                                                                                                                                                                                                                                                                                                                                                                                                                                                                                                                                                                                                                                                                       |              |                                    |
| CXCL10 | C7, small-inducible cytokine B10, INP10, OTTHUMP00000219215, 10 kDa interferon gamma-induced protein, gamma-IP10, crg-2, small inducible cytokine subfamily B (Cys-X-Cys), member 10, IFI10, protein 10 from interferon (gamma)-induced cell line, interferon-inducible cytokine IP-10, IP-10, SCYB10, gamma IP10, C-X-C motif chemokine 10, mob-1, gIP-10, small inducible cytokine B10                                                                                                                                                                                                                                                                                                                                                                                                                                                                                                                                                                                                                                                                             | NM_001565    | chemokine (C-X-C motif) ligand 10  |
| CXCL8  | K60, chemokine (C-X-C motif) ligand 8, lymphocyte derived neutrophil activating peptide, LUCT, C-X-C motif chemokine 8, OTTHUMP00000199824, protein 3-10C, MDNCF, TSG-1, monocyte-derived neutrophil chemotactic factor, neutrophil-activating factor, MONAP, LECT, interleukin-8, AMCF-I, GCP1, LUCT/interleukin-8, CXC chemokine ligand 8, granulocyte chemotactic protein 1, emoctakin, T-cell chemotactic factor, NAP1, CXCL8, b-ENAP, lung giant cell carcinoma-derived chemotactic protein, LYNAP, SCYB8, small inducible cytokine subfamily B, member 8, GCP-1, monocyte derived neutrophil-activating protein, alveolar macrophage chemotactic factor I, NAP-1, neutrophil-activating peptide 1, T cell chemotactic factor, IL-8, tumor necrosis factor-induced gene 1, NAF, OTTHUMP00000199825, neutrophil-activating protein 1, 3-10C, beta endothelial cell-derived neutrophil activating peptide, lymphocyte-derived neutrophil-activating factor, beta-thromboglobulin-like protein, monocyte-derived neutrophil-activating peptide, interleukin 8, IL8 | NM_000584    | chemokine (C-X-C motif) ligand 8   |
| LBP    | lipopolysaccharide-binding protein, MGC22233, OTTHUMP00000030965, LPS-binding protein, BPI fold containing family D, member 2                                                                                                                                                                                                                                                                                                                                                                                                                                                                                                                                                                                                                                                                                                                                                                                                                                                                                                                                        | NM_004139    | lipopolysaccharide binding protein |
| CXCL9  | CMK, small-inducible cytokine B9, C-X-C motif chemokine 9, monokine induced by interferon-gamma, SCYB9, gamma-interferon-induced monokine, monokine induced by gamma interferon, MIG, OTTHUMP00000219216, small inducible cytokine B9, crg-10, Humig                                                                                                                                                                                                                                                                                                                                                                                                                                                                                                                                                                                                                                                                                                                                                                                                                 | NM_002416    | chemokine (C-X-C motif) ligand 9   |
| LTF    | HLF2, OTTHUMP00000209781, neutrophil lactoferrin, OTTHUMP00000209779, lactoferrin, GIG12, talalactoferrin, growth-inhibiting protein 12, OTTHUMP00000209780, kaliocin-1, lactoferricin, epididymis luminal protein 110, lactoferroxin                                                                                                                                                                                                                                                                                                                                                                                                                                                                                                                                                                                                                                                                                                                                                                                                                                | NM_001199149 | lactotransferrin                   |
| IFNA2  | interferon alpha A, interferon alpha 2a, INFA2, IeIF A, interferon alpha 2b, cytokine, IFNA, interferon alpha-A, OTTHUMP00000021143, alpha-2a interferon, IFN-alpha-2, MGC125764, MGC125765, interferon alpha-2, RP11-354P17.2                                                                                                                                                                                                                                                                                                                                                                                                                                                                                                                                                                                                                                                                                                                                                                                                                                       | NM_000605    | interferon, alpha 2                |
| LYZ    | lysozyme, 1,4-beta-N-acetylmuramidase C, renal amyloidosis, lysozyme C, c-type lysozyme                                                                                                                                                                                                                                                                                                                                                                                                                                                                                                                                                                                                                                                                                                                                                                                                                                                                                                                                                                              | NM_000239    | lysozyme                           |
| IFNG   | IFG, OTTHUMP00000240111, immune interferon, IFI, IFN-gamma, interferon gamma                                                                                                                                                                                                                                                                                                                                                                                                                                                                                                                                                                                                                                                                                                                                                                                                                                                                                                                                                                                         | NM_000619    | interferon, gamma                  |

|       |                                                                                                                                                                                                                                                                                                                                                                                                                                                                                                                                                                                                                                                                         |              |                                          |
|-------|-------------------------------------------------------------------------------------------------------------------------------------------------------------------------------------------------------------------------------------------------------------------------------------------------------------------------------------------------------------------------------------------------------------------------------------------------------------------------------------------------------------------------------------------------------------------------------------------------------------------------------------------------------------------------|--------------|------------------------------------------|
| IL10  | cytokine synthesis inhibitory factor, OTTHUMP00000034567, TGIF, IL-10, IL10A, CSIF, MGC126451, T-cell growth inhibitory factor, interleukin-10, MGC126450, RP11-262N9.1                                                                                                                                                                                                                                                                                                                                                                                                                                                                                                 | NM_000572    | interleukin 10                           |
| IL17F | ML1, interleukin-24, cytokine ML-1, IL-17F, OTTHUMP00000016602, interleukin-17F, ML-1, IL-24, mutant IL-17F                                                                                                                                                                                                                                                                                                                                                                                                                                                                                                                                                             | NM_052872    | interleukin 17F                          |
| IL1A  | IL1A (IL1F1), IL-1A, interleukin-1 alpha, OTTHUMP000000203692, OTTHUMP000000161990, hematopoietin-1, preinterleukin 1 alpha, IL1F1, IL-1 alpha, IL1, IL1-ALPHA, pro-interleukin-1-alpha                                                                                                                                                                                                                                                                                                                                                                                                                                                                                 | NM_000575    | interleukin 1, alpha                     |
| NAIP  | neuronal apoptosis inhibitory protein, psi neuronal apoptosis inhibitory protein, baculoviral IAP repeat-containing protein 1, OTTHUMP000000125255, BIRC1, psiNAIP, OTTHUMP000000226926, NLR family, BIR domain containing 1, OTTHUMP000000226927, NAIP, baculoviral IAP repeat-containing 1, nucleotide-binding oligomerization domain, leucine rich repeat and BIR domain containing 1, OTTHUMP000000226928                                                                                                                                                                                                                                                           | NM_004536    | NLR family, apoptosis inhibitory protein |
| IL1RN | IRAP, IL1RA, MGC10430, type II interleukin-1 receptor antagonist, OTTHUMP000000203730, OTTHUMP000000162024, OTTHUMP000000162022, IL1F3, IL1RN (IL1F3), intracellular IL-1 receptor antagonist type II, intracellular interleukin-1 receptor antagonist (icIL-1ra), IL-1ra3, interleukin-1 receptor antagonist protein, OTTHUMP000000162023, IL1 inhibitor, OTTHUMP000000203731, ICIL-1RA                                                                                                                                                                                                                                                                                | NM_000577    | interleukin 1 receptor antagonist        |
| NLRC4 | CLAN, CLANB, CARD12, OTTHUMP000000201170, OTTHUMP000000201173, ICE-protease activating factor, nucleotide-binding oligomerization domain, leucine rich repeat and CARD domain containing 4, CLANA, OTTHUMP000000201172, CARD, LRR, and NACHT-containing protein, NLR family CARD domain-containing protein 4, caspase recruitment domain protein 12, CLANC, NOD-like receptor C4, caspase recruitment domain-containing protein 12, caspase recruitment domain family, member 12, CLAND, ice protease-activating factor, CLAN1, OTTHUMP000000201171, IPAF, UNQ6189/PRO20215                                                                                             | NM_001199138 | NLR family, CARD domain containing 4     |
| NLRP1 | CARD7, NACHT, LRR and PYD containing protein 1, systemic lupus erythematosus, vitiligo-related 1, DEFCAP-L/S, NAC-alpha/beta/gamma/delta, DKFZp586O1822, NACHT, leucine rich repeat and PYD (pyrin domain) containing 1, NACHT, leucine rich repeat and PYD containing 1, death effector filament-forming Ced-4-like apoptosis protein, nucleotide-binding domain and caspase recruitment domain, NACHT, LRR and PYD domains-containing protein 1, PP1044, DEFCAP, nucleotide-binding oligomerization domain, leucine rich repeat and pyrin domain containing 1, KIAA0926, caspase recruitment domain protein 7, caspase recruitment domain-containing protein 7, NALP1 | NM_001033053 | NLR family, pyrin domain containing 1    |
| IL22  | interleukin 21, zcyto18, ILTIF, interleukin-22, cytokine Zcyto18, IL-10-related T-cell-derived inducible factor, TIFIL-23, IL-21, MGC79382, IL-D110, IL-TIF, IL-22, TIFa, OTTHUMP000000240117, IL-10-related T-cell-derived-inducible factor, IL21, MGC79384, UNQ3099/PRO10096                                                                                                                                                                                                                                                                                                                                                                                          | NM_020525    | interleukin 22                           |



|       |                                                                                                                                                                                                                                                                                                                                                                                                                                                                                                                                                                                                                                                                                                                       |              |                                                        |
|-------|-----------------------------------------------------------------------------------------------------------------------------------------------------------------------------------------------------------------------------------------------------------------------------------------------------------------------------------------------------------------------------------------------------------------------------------------------------------------------------------------------------------------------------------------------------------------------------------------------------------------------------------------------------------------------------------------------------------------------|--------------|--------------------------------------------------------|
| NLRP3 | FCU, cryopyrin, cold autoinflammatory syndrome 1 protein, OTTHUMP00000230825, PYRIN-containing APAF1-like protein 1, NACHT, LRR and PYD domains-containing protein 3, OTTHUMP00000038409, nucleotide-binding oligomerization domain, leucine rich repeat and pyrin domain containing 3, caterpillar protein 1.1, CIAS1, AGTAVPRL, Muckle-Wells syndrome, OTTHUMP00000038410, OTTHUMP00000038411, chromosome 1 open reading frame 7, NACHT, LRR and PYD containing protein 3, NALP3, MWS, NACHT domain-, leucine-rich repeat-, and PYD-containing protein 3, AII/AVP, OTTHUMP00000038408, angiotensin/vasopressin receptor AII/AVP-like, AII/AVP receptor-like, FCAS, cold autoinflammatory syndrome 1, PYPAF1, C1orf7 | NM_001079821 | NLR family, pyrin domain containing 3                  |
| IL23A | interleukin 23 p19 subunit, interleukin-23 subunit alpha, MGC79388, IL-23-A, P19, IL23P19, IL-23p19, interleukin-23 subunit p19, JKA3 induced upon T-cell activation, IL-23A, IL-23 subunit alpha, IL-23, SGRF, interleukin-six, G-CSF related factor, UNQ2498/PRO5798                                                                                                                                                                                                                                                                                                                                                                                                                                                | NM_016584    | interleukin 23, alpha subunit p19                      |
| NOD1  | caspase recruitment domain 4, caspase recruitment domain family, member 4, nucleotide-binding oligomerization domain-containing protein 1, OTTHUMP00000158742, NLR family, CARD domain containing 1, CARD4, nucleotide-binding oligomerization domain, leucine rich repeat and CARD domain containing 1, caspase recruitment domain-containing protein 4, NOD1                                                                                                                                                                                                                                                                                                                                                        | NM_006092    | nucleotide-binding oligomerization domain containing 1 |
| IL24  | C49A, IL-4-induced secreted protein, interleukin-24, melanocyte-associated Mda-7, Mob-5, IL-24 splice variant delE3, melanoma differentiation-associated gene 7 protein, suppression of tumorigenicity 16 (melanoma differentiation), mda-7, MDA7, IL-24, ST16, OTTHUMP00000034621, OTTHUMP00000216789, OTTHUMP00000034620, FISP, suppression of tumorigenicity 16 protein, IL-24 splice variant delE5, melanoma differentiation association protein 7, IL10B, OTTHUMP00000216790                                                                                                                                                                                                                                     | NM_001185156 | interleukin 24                                         |
| NOD2  | CD, LRR-containing protein, BLAU, NOD2 protein, Arthrocutaneouveal granulomatosis (Blau syndrome), OTTHUMP00000164224, NOD2, nucleotide-binding oligomerization domain 2, IBD1, OTTHUMP00000236088, NOD2B, PSORAS1, ACUG, caspase recruitment domain protein 15, nucleotide-binding oligomerization domain, leucine rich repeat and CARD domain containing 2, NOD-like receptor C2, nucleotide-binding oligomerization domain-containing protein 2, inflammatory bowel disease protein 1, NLR family, CARD domain containing 2, caspase recruitment domain family, member 15, caspase recruitment domain-containing protein 15, CARD15                                                                                | NM_022162    | nucleotide-binding oligomerization domain containing 2 |
| IL27  | p28, interleukin-27 subunit alpha, IL30, MGC71873, IL-27 p28 subunit, OTTHUMP00000122516, IL-27, IL-27 subunit alpha, interleukin 30, IL27-A, IL27p28, IL-27-A, interleukin-30                                                                                                                                                                                                                                                                                                                                                                                                                                                                                                                                        | NM_145659    | interleukin 27                                         |

|        |                                                                                                                                                                                                                                                                                                                                                                           |           |                                                                          |
|--------|---------------------------------------------------------------------------------------------------------------------------------------------------------------------------------------------------------------------------------------------------------------------------------------------------------------------------------------------------------------------------|-----------|--------------------------------------------------------------------------|
| PYCARD | caspase recruitment domain protein 5, OTTHUMP00000163240, hASC, CARD5, caspase recruitment domain-containing protein 5, OTTHUMP00000163239, TMS1, PYD and CARD domain-containing protein, MGC10332, target of methylation-induced silencing 1, target of methylation-induced silencing-1, apoptosis-associated speck-like protein containing a CARD, ASC, TMS1, ASC       | NM_013258 | PYD and CARD domain containing                                           |
| LIF    | CDF, differentiation-stimulating factor, MLPLI, differentiation-inducing factor, human interleukin in DA cells, differentiation inhibitory activity, melanoma-derived LPL inhibitor, D-FACTOR, cholinergic differentiation factor, differentiation stimulating factor, leukemia inhibitory factor, D factor, OTTHUMP00000198698, hepatocyte-stimulating factor III, HILDA | NM_002309 | leukemia inhibitory factor                                               |
| LTA    | lymphotoxin alpha, OTTHUMP00000165897, tumor necrosis factor ligand superfamily member 1, cytokine, TNFB, lymphotoxin-alpha, LT, LT-alpha, tumor necrosis factor beta, TNF-beta, OTTHUMP00000037613, OTTHUMP00000029184, TNFSF1, OTTHUMP00000037612, lymphotoxin A, DAMA-25N12.13-004, TNF superfamily, member 1                                                          | NM_000595 | lymphotoxin alpha                                                        |
| SLPI   | ALP, secretory leukocyte protease inhibitor (antileukoproteinase), mucus proteinase inhibitor, secretory leukocyte protease inhibitor, HUSI-I, protease inhibitor WAP4, ALK1, BLPI, HUSI, seminal proteinase inhibitor, WAP four-disulfide core domain protein 4, WFDC4, MPI, HUSI-1, OTTHUMP00000031775, WAP four-disulfide core domain 4, antileukoproteinase, WAP4     | NM_003064 | secretory leukocyte peptidase inhibitor                                  |
| LTB    | OTTHUMP00000038214, p33, cytokine, TNFC, lymphotoxin-beta, tumor necrosis factor ligand superfamily member 3, TNF-C, tumor necrosis factor C, TNFSF3, LT-beta, OTTHUMP00000215145, OTTHUMP00000029185, DAAP-90L16.4                                                                                                                                                       | NM_002341 | lymphotoxin beta (TNF superfamily, member 3)                             |
| MIF    | phenylpyruvate tautomerase, GIF, glycosylation-inhibiting factor, L-dopachrome isomerase, OTTHUMP00000198465, macrophage migration inhibitory factor, MMIF, L-dopachrome tautomerase, GLIF                                                                                                                                                                                | NM_002415 | macrophage migration inhibitory factor (glycosylation-inhibiting factor) |
| TLR2   | TIL4, toll/interleukin 1 receptor-like 4, toll/interleukin-1 receptor-like protein 4, CD282                                                                                                                                                                                                                                                                               | NM_003264 | toll-like receptor 2                                                     |
| TLR4   | TOLL, hToll, homolog of Drosophila toll, OTTHUMP00000022807, CD284                                                                                                                                                                                                                                                                                                        | NM_003266 | toll-like receptor 4                                                     |
| TLR5   | TIL3, Toll/interleukin-1 receptor-like protein 3, MGC126431, FLJ10052, OTTHUMP00000036040, MGC126430, OTTHUMP00000036039, RP11-239E10.1, systemic lupus erythematosus susceptibility 1                                                                                                                                                                                    | NM_003268 | toll-like receptor 5                                                     |
| TLR9   | CD289, OTTHUMP00000212618, UNQ5798/PRO19605                                                                                                                                                                                                                                                                                                                               | NM_017442 | toll-like receptor 9                                                     |
| TNF    | OTTHUMP00000037669, tumor necrosis factor alpha, TNF-alpha, TNFA, OTTHUMP00000029281, TNF, macrophage-derived, cachectin, APC1 protein, TNF superfamily, member 2, TNF-a, TNFSF2, tumor necrosis factor-alpha, tumor necrosis factor ligand superfamily member 2, TNF, monocyte-derived, DIF, DADB-70P7.1                                                                 | NM_000594 | tumor necrosis factor                                                    |

|       |                                                                                                                                                                                                                                                                                                                                                                                                                                                                                                                                                            |              |                                                               |
|-------|------------------------------------------------------------------------------------------------------------------------------------------------------------------------------------------------------------------------------------------------------------------------------------------------------------------------------------------------------------------------------------------------------------------------------------------------------------------------------------------------------------------------------------------------------------|--------------|---------------------------------------------------------------|
| TRAF6 | RNF85, E3 ubiquitin-protein ligase TRAF6, OTTHUMP00000232773, TNF receptor-associated factor 6, MGC:3310, OTTHUMP00000232772, RING finger protein 85, interleukin-1 signal transducer                                                                                                                                                                                                                                                                                                                                                                      | NM_004620    | TNF receptor-associated factor 6, E3 ubiquitin protein ligase |
| VEGFA | VEGFA, OTTHUMP00000224109, OTTHUMP00000016487, vascular endothelial growth factor isoform VEGF165, OTTHUMP00000224153, OTTHUMP00000224425, OTTHUMP00000224107, vascular endothelial growth factor 165b, VPF, OTTHUMP00000016488, MGC70609, OTTHUMP00000224426, VEGF, OTTHUMP00000224108, OTTHUMP00000224427, OTTHUMP00000224430, OTTHUMP00000224428, OTTHUMP00000165986, OTTHUMP00000165985, OTTHUMP00000224429, OTTHUMP00000224423, OTTHUMP00000165987, growth factor, vascular permeability factor, OTTHUMP00000224424, OTTHUMP00000224154, RP1-261G23.1 | NM_001025366 | vascular endothelial growth factor A                          |
| XCL1  | LTN, small-inducible cytokine C1, XC chemokine ligand 1, LPTN, SCM-1-alpha, OTTHUMP00000032498, SCM1, SCYC1, lymphotaxin, c motif chemokine 1, SCM-1a, SCM-1, small inducible cytokine subfamily C, member 1 (lymphotactin), single cysteine motif 1a, OTTHUMP00000060404, lymphotactin, region containing small inducible cytokine subfamily C, member 1 (lymphotactin); small inducible cyt, ATAC, cytokine SCM-1                                                                                                                                        | NM_002995    | chemokine (C motif) ligand 1                                  |
| ZBP1  | DLM1, DLM-1, chromosome 20 open reading frame 183, DNA-dependent activator of IFN-regulatory factors, OTTHUMP00000237854, OTTHUMP00000031373, DNA-dependent activator of interferon regulatory factors, tumor stroma and activated macrophage protein DLM-1, C20ORF183, OTTHUMP00000174290, Z-DNA-binding protein 1, DNA-dependent activator of IRFs, RP4-718J7.1                                                                                                                                                                                          | NM_001160417 | Z-DNA binding protein 1                                       |
| ACTB  | beta actin, OTTHUMP00000024886, beta cytoskeletal actin, actin, cytoplasmic 1, PS1TP5-binding protein 1, beta-actin                                                                                                                                                                                                                                                                                                                                                                                                                                        | NM_001101    | actin, beta                                                   |
| B2M   | beta chain of MHC class I molecules, beta-2-microglobulin, OTTHUMP00000161912, CDABP0092                                                                                                                                                                                                                                                                                                                                                                                                                                                                   | NM_004048    | beta-2-microglobulin                                          |
| GAPDH | G3PD, aging-associated gene 9 protein, MGC88685, OTTHUMP00000174434, OTTHUMP00000174430, 3' end, peptidyl-cysteine S-nitrosylase GAPDH, OTTHUMP00000174431, OTTHUMP00000174432, glyceraldehyde 3-phosphate dehydrogenase, GAPDH, GAPD, CDABP0047, epididymis secretory sperm binding protein Li 162eP                                                                                                                                                                                                                                                      | NM_001256799 | glyceraldehyde-3-phosphate dehydrogenase                      |
| HPRT1 | HPRT, hypoxanthine phosphoribosyltransferase 1 (Lesch-Nyhan syndrome), HGPRT, OTTHUMP00000024061, HGPRTase, hypoxanthine phosphoribosyltransferase 1, hypoxanthine-guanine phosphoribosyltransferase, Lesch-Nyhan syndrome P0, L10E, PRLP0, MGC111226, MGC88175, 60S ribosomal protein L10E, ribosomal protein P0, acidic ribosomal phosphoprotein P0, RPP0, 60S acidic ribosomal protein P0                                                                                                                                                               | NM_000194    | hypoxanthine phosphoribosyltransferase 1                      |
| RPLP0 |                                                                                                                                                                                                                                                                                                                                                                                                                                                                                                                                                            | NM_001002    | ribosomal protein, large, P0                                  |
| GDC   | Human Genomic DNA contamination                                                                                                                                                                                                                                                                                                                                                                                                                                                                                                                            |              |                                                               |
| PPC   | Positive PCR Control                                                                                                                                                                                                                                                                                                                                                                                                                                                                                                                                       |              |                                                               |

|     |                               |  |  |
|-----|-------------------------------|--|--|
| RTC | Reverse Transcription Control |  |  |
|-----|-------------------------------|--|--|
